# Supplementary material for: Morpholine substituted quinazoline derivatives as anticancer agents against MCF-7, A549 and SHSY-5Y cancer cell lines and mechanistic studies
Source: Royal Society of Chemistry journal article supplement (doi:10.1039/d2md00023g), 2022-01-01
Supplement: d2md00023g1.pdf [file d2md00023g1.pdf]

## Supplementary Material

### <sup>1</sup>H, <sup>13</sup>C NMR, & HRMS Spectra of Representative Compounds

#### Content

#### Spectras of representative compounds

**Figure 1.** Spectras of compound **AK-1**

**Figure 2.** Spectras of compound **AK-2**

**Figure 3.** Spectras of compound **AK-3**

**Figure 4.** Spectras of compound **AK-4**

**Figure 5.** Spectras of compound **AK-5**

**Figure 6.** Spectras of compound **AK-6**

**Figure 7.** Spectras of compound **AK-7**

**Figure 8.** Spectras of compound **AK-8**

**Figure 9.** Spectras of compound **AK-9**

**Figure 10.** Spectras of compound **AK-10**

**Figure 11.** Spectras of compound **AK-11**

**Figure 12.** Spectras of compound **AK-12**

**Figure 13.** Spectras of compound **AK-13**

Figure 14: Docking pose of AK-3 (A) and AK-10 (B) with **BAX**- PDB-ID: 4S0O

Figure 15: Docking pose of AK-3 (A) and AK-10 (B) with **BCL-XL**- PDB-ID: 6VWC

Table 1: R SQUARED VALUES

# Elemental Composition Report

## Single Mass Analysis

Tolerance = 300.0 PPM / DBE: min = -1.5, max = 50.0

Element prediction: Off

Number of isotope peaks used for i-FIT = 5

Monoisotopic Mass, Even Electron Ions

5 formula(e) evaluated with 1 results within limits (all results (up to 1000) for each mass)

Elements Used:

C: 18-18 H: 0-300 N: 0-4 O: 1-1

Sample Name : 280921\_AK-1

IITRPR

XEVO G2-XS QTOF

Test Name :

280921\_AK-1 20 (0.435)

1: TOF MS ES+  
2.47e+007

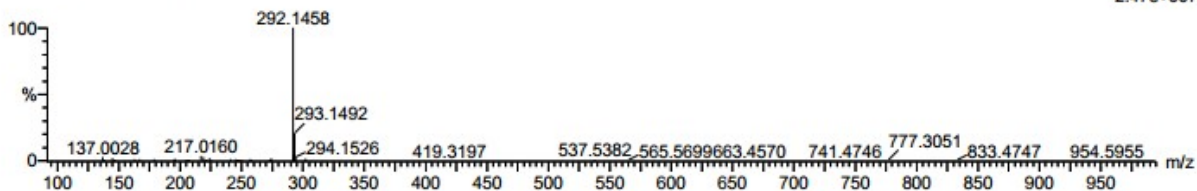

Minimum: -1.5  
Maximum: 2.0 300.0 50.0

| Mass     | Calc. Mass | mDa | PPM | DBE  | i-FIT  | Norm | Conf (%) | Formula      |
|----------|------------|-----|-----|------|--------|------|----------|--------------|
| 292.1458 | 292.1450   | 0.8 | 2.7 | 11.5 | 1712.7 | n/a  | n/a      | C18 H18 N3 O |

bhupinder 19-12-20  
AK-67  
PROTON CDCl<sub>3</sub> (C: Bruker TopSpin 9.2) cil 4

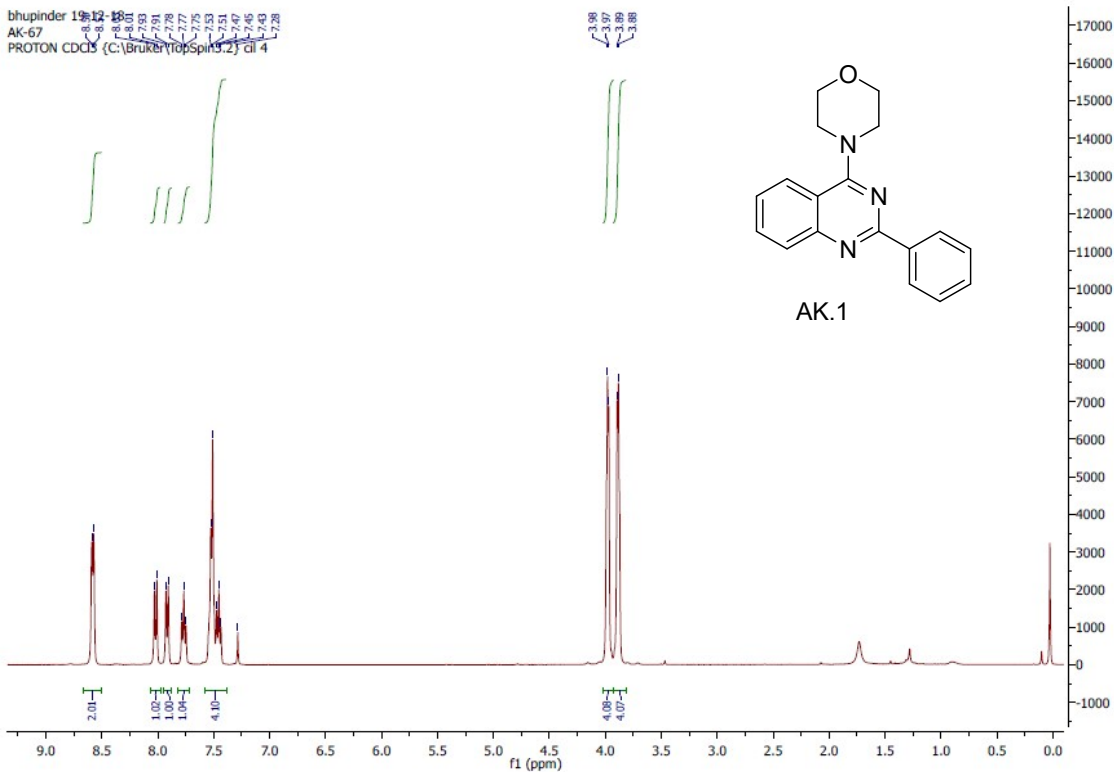

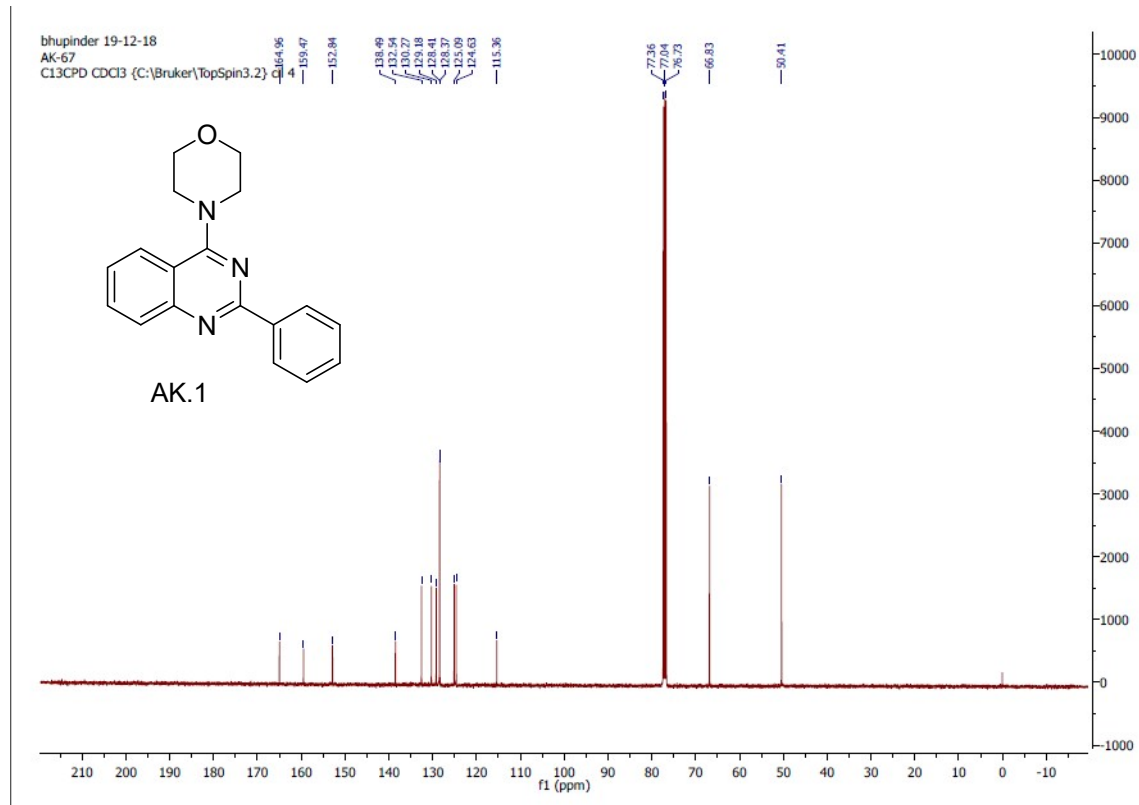

**Figure 1.** Spectras of compound AK-1

## Elemental Composition Report

Page 1

### Single Mass Analysis

Tolerance = 300.0 PPM / DBE: min = -1.5, max = 50.0

Element prediction: Off

Number of isotope peaks used for i-FIT = 5

Monoisotopic Mass, Even Electron Ions

10 formula(e) evaluated with 1 results within limits (all results (up to 1000) for each mass)

Elements Used:

C: 19-19 H: 0-300 N: 0-4 O: 1-1 S: 0-1

Sample Name : 280921\_AK-2

IITRPR

XEVO G2-XS QTOF

Test Name :

280921\_AK-2 21 (0.452)

1: TOF MS ES+  
2.52e+007

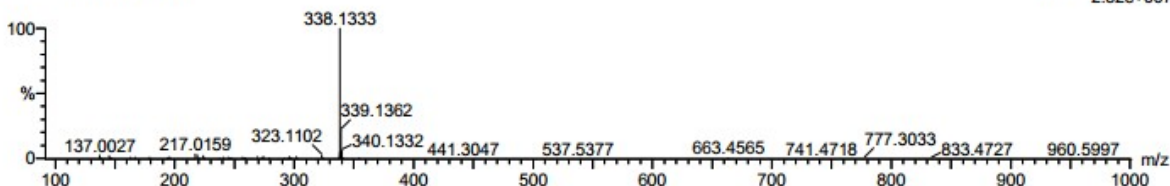

Minimum: -1.5  
Maximum: 2.0 300.0 50.0

| Mass     | Calc. Mass | mDa | PPM | DBE  | i-FIT  | Norm | Conf (%) | Formula        |
|----------|------------|-----|-----|------|--------|------|----------|----------------|
| 338.1333 | 338.1327   | 0.6 | 1.8 | 11.5 | 1621.8 | n/a  | n/a      | C19 H20 N3 O S |

bhupinder 19-12-18  
AK-70  
PROTON CDCl3 (C:\Bruker\TopSpin3.2) cil 5

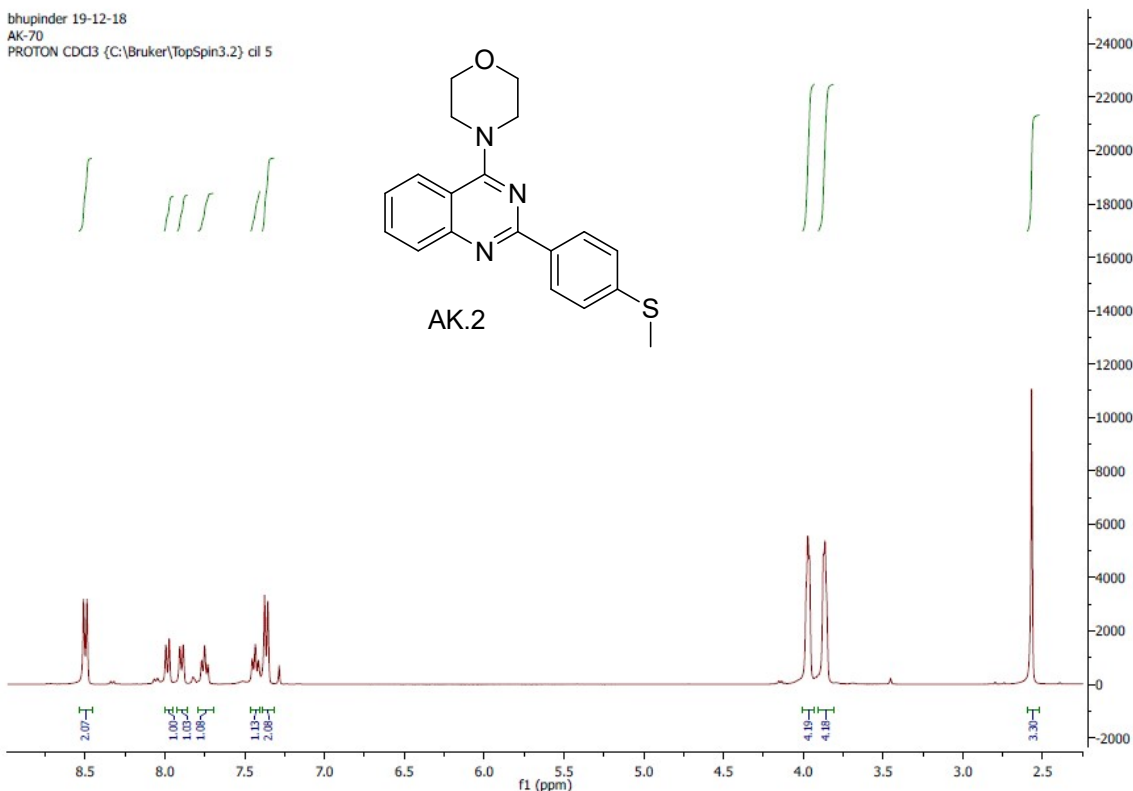

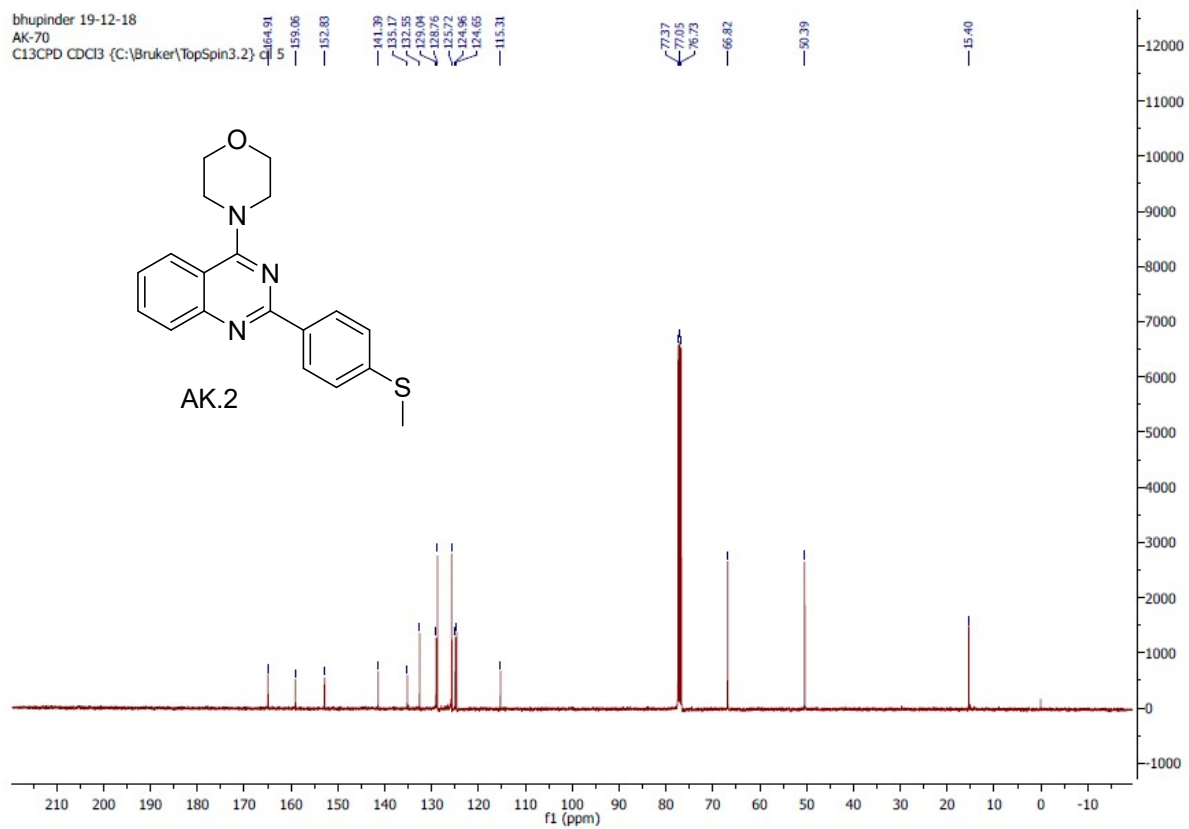

**Figure 2.** Spectras of compound AK-2

# Elemental Composition Report

## Single Mass Analysis

Tolerance = 300.0 PPM / DBE: min = -1.5, max = 50.0

Element prediction: Off

Number of isotope peaks used for i-FIT = 5

Monoisotopic Mass, Even Electron Ions

5 formula(e) evaluated with 0 results within limits (all results (up to 1000) for each mass)

Elements Used:

C: 18-18 H: 0-300 N: 0-4 O: 1-1 F: 6-6

Sample Name : 280921\_AK-3

IITRPR

XEVO G2-XS QTOF

Test Name :

280921\_AK-3 23 (0.497)

1: TOF MS ES+

1.40e+007

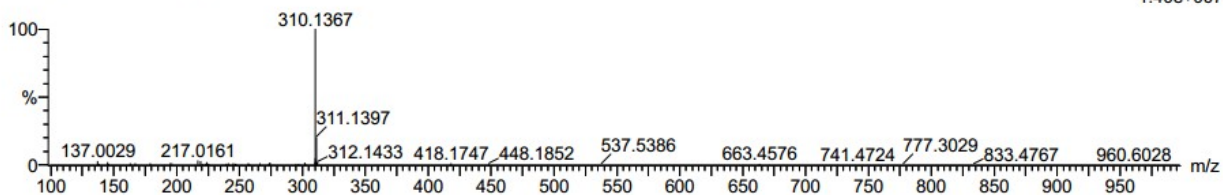

Apr05-2019  
AK-85

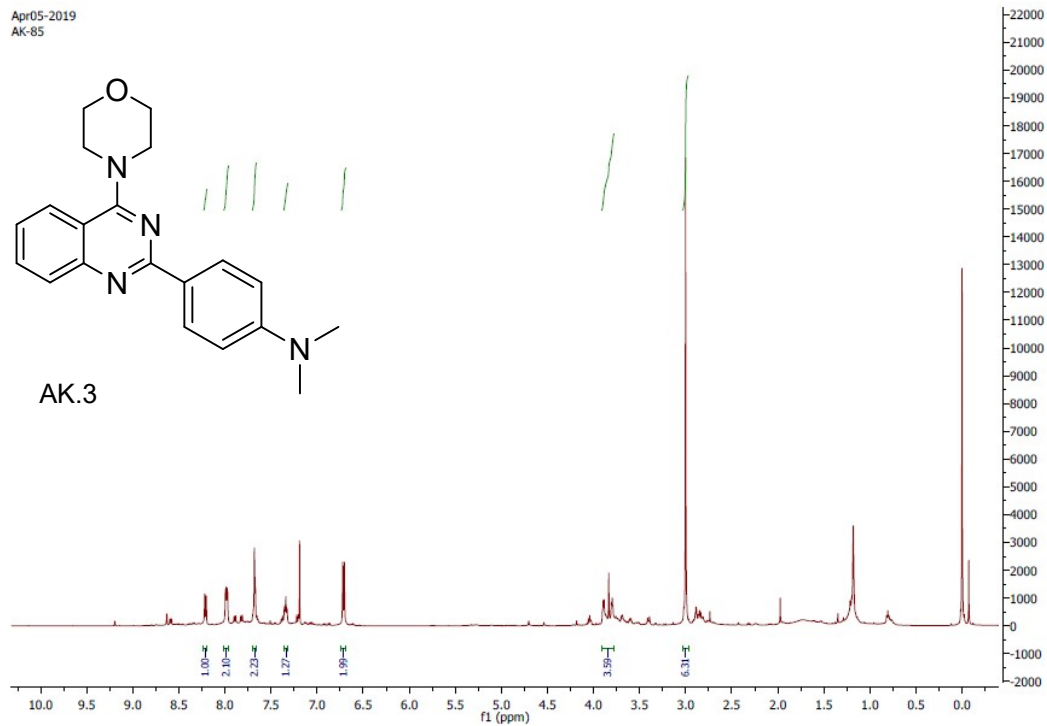

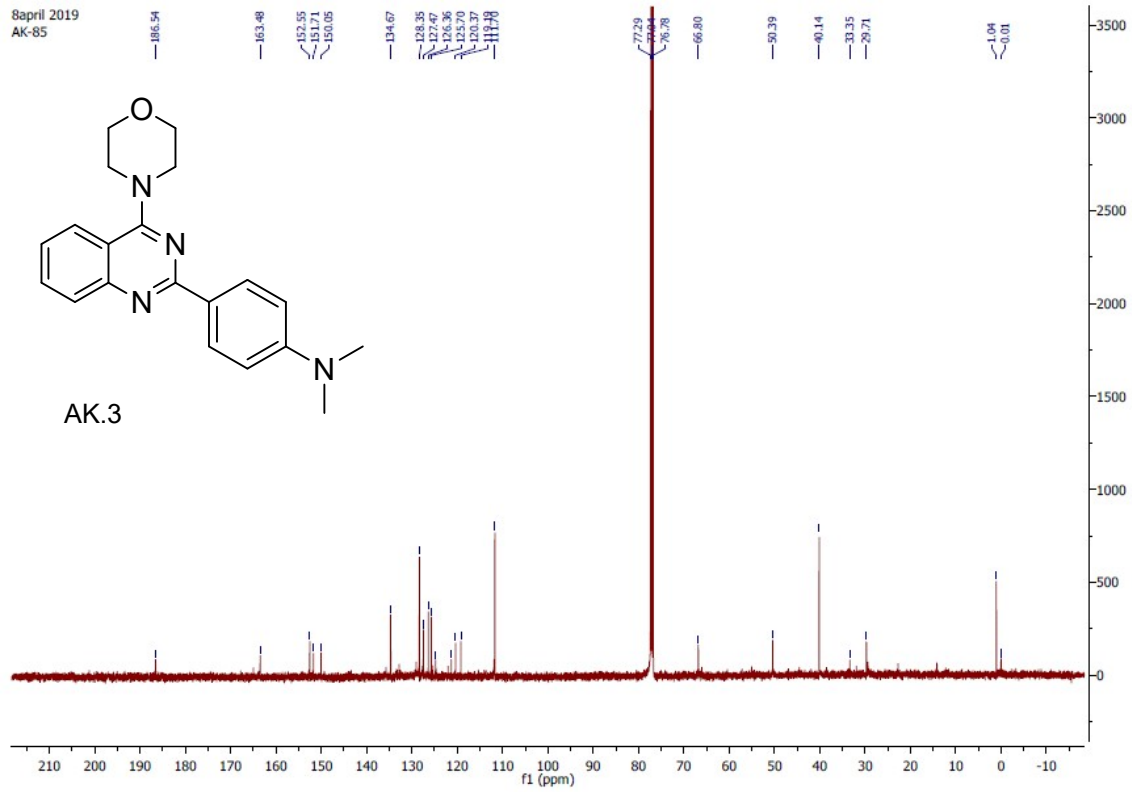

**Figure 3.** Spectras of compound AK-3

Elemental Composition Report

Single Mass Analysis

Tolerance = 300.0 PPM / DBE: min = -1.5, max = 50.0

Element prediction: Off

Number of isotope peaks used for i-FIT = 5

Monoisotopic Mass, Even Electron Ions

5 formula(e) evaluated with 1 results within limits (all results (up to 1000) for each mass)

Elements Used:

C: 20-20 H: 0-300 N: 0-4 O: 1-1

Sample Name : 280921\_AK-4

IITRPR

XEVO G2-XS QTOF

Test Name :

280921\_AK-4 22 (0.480)

1: TOF MS ES+  
5.43e+006

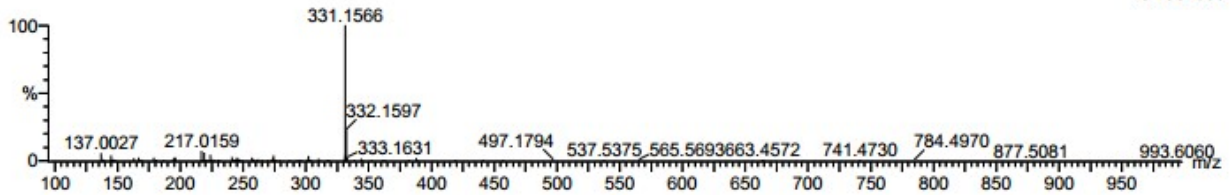

Minimum: -1.5  
Maximum: 2.0 300.0 50.0

| Mass     | Calc. Mass | mDa | PPM | DBE  | i-FIT  | Norm | Conf (%) | Formula      |
|----------|------------|-----|-----|------|--------|------|----------|--------------|
| 331.1566 | 331.1559   | 0.7 | 2.1 | 13.5 | 1853.0 | n/a  | n/a      | C20 H19 N4 O |

Apr05-2019  
AK-72

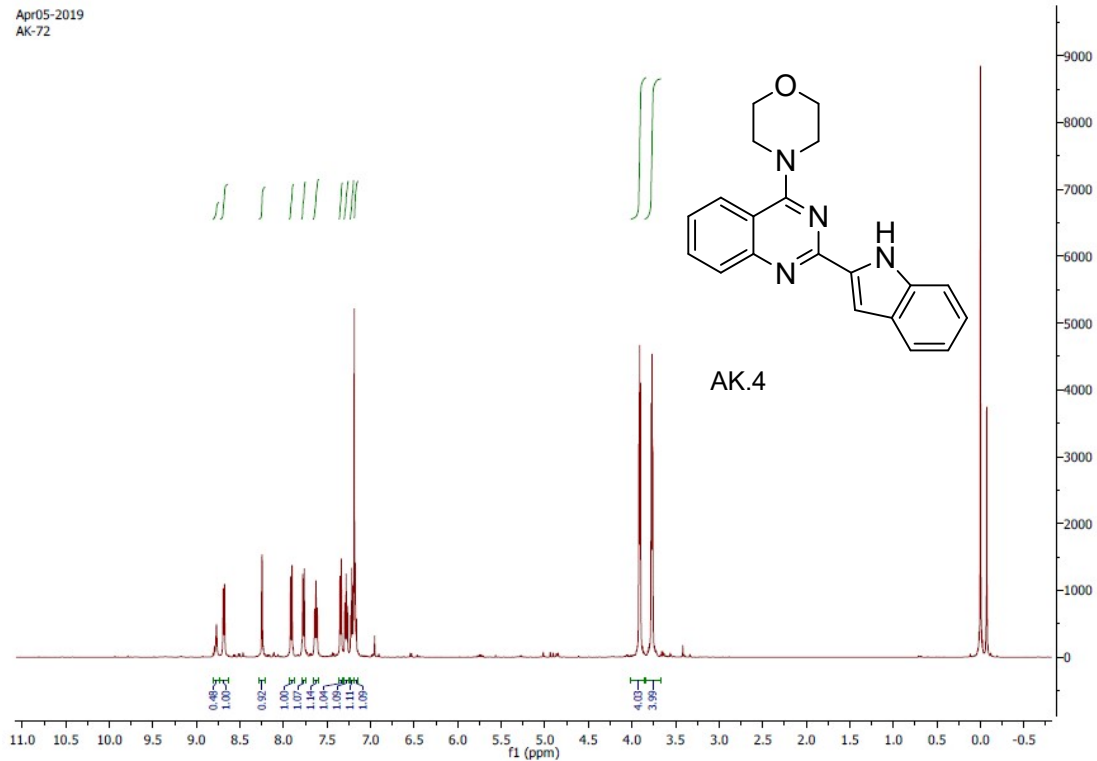



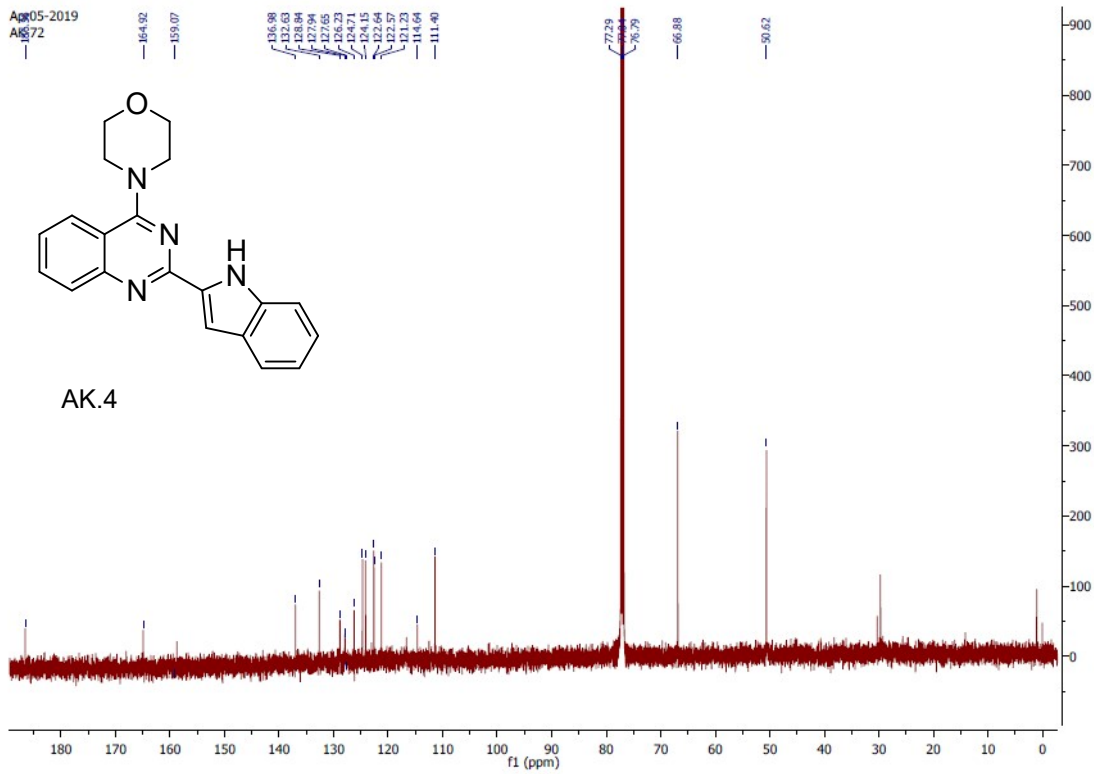

**Figure 4.** Spectras of compound **AK-4**

Single Mass Analysis

Tolerance = 300.0 PPM / DBE: min = -1.5, max = 50.0

Element prediction: Off

Number of isotope peaks used for i-FIT = 5

Monoisotopic Mass, Even Electron Ions

10 formula(e) evaluated with 1 results within limits (all results (up to 1000) for each mass)

Elements Used:

C: 18-18 H: 0-300 N: 0-4 O: 1-2

Sample Name : 280921\_AK-5

IITRPR

XEVO G2-XS QTOF

Test Name :

280921\_AK-5 34 (0.729)

1: TOF MS ES+  
3.38e+006

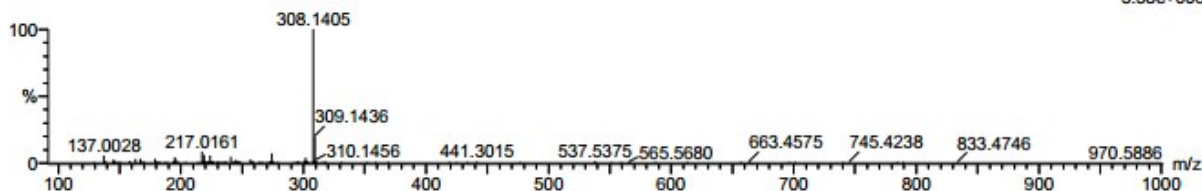

Minimum: -1.5  
Maximum: 2.0 300.0 50.0

| Mass     | Calc. Mass | mDa | PPM | DBE  | i-FIT  | Norm | Conf (%) | Formula       |
|----------|------------|-----|-----|------|--------|------|----------|---------------|
| 308.1405 | 308.1399   | 0.6 | 1.9 | 11.5 | 1936.7 | n/a  | n/a      | C18 H18 N3 O2 |

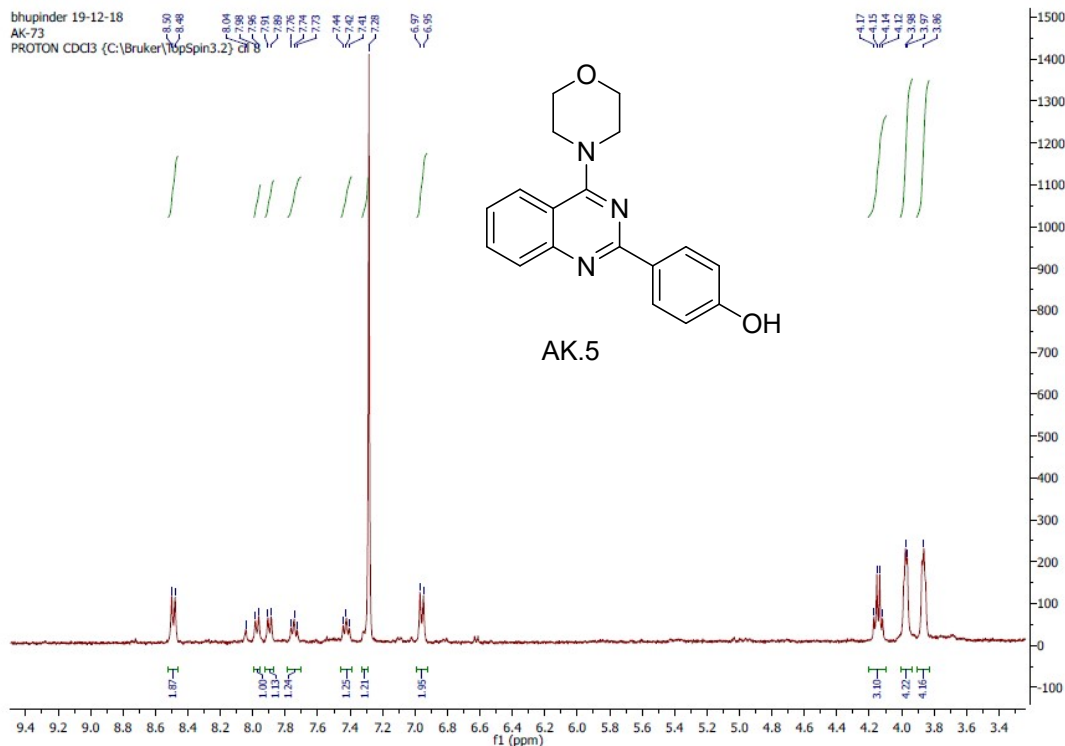

Figure 5. Spectras of compound AK-5

Single Mass Analysis

Tolerance = 300.0 PPM / DBE: min = -1.5, max = 50.0

Element prediction: Off

Number of isotope peaks used for i-FIT = 5

Monoisotopic Mass, Even Electron Ions

3 formula(e) evaluated with 1 results within limits (all results (up to 1000) for each mass)

Elements Used:

C: 19-19 H: 0-300 N: 4-4 O: 0-2

Sample Name : 280921\_AK-6

IITRPR

XEVO G2-XS QTOF

Test Name :

280921\_AK-6 32 (0.684)

1: TOF MS ES+

2.03e+006

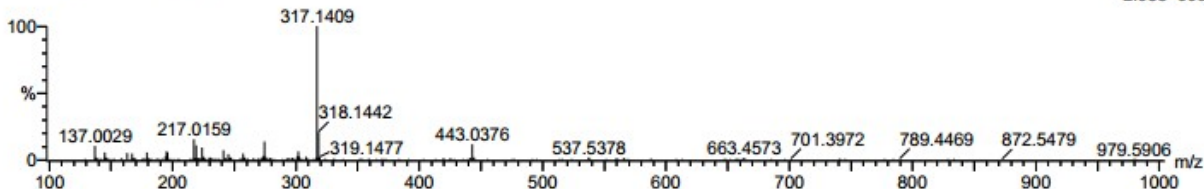

Minimum: -1.5  
Maximum: 2.0 300.0 50.0

| Mass     | Calc. Mass | mDa | PPM | DBE  | i-FIT  | Norm | Conf (%) | Formula      |
|----------|------------|-----|-----|------|--------|------|----------|--------------|
| 317.1409 | 317.1402   | 0.7 | 2.2 | 13.5 | 1843.6 | n/a  | n/a      | C19 H17 N4 O |

BHUPINDER 5-5-19  
AK 76

PROTON CDCl3 (C:\Bruker\TopSpin3.2)\Gil 21

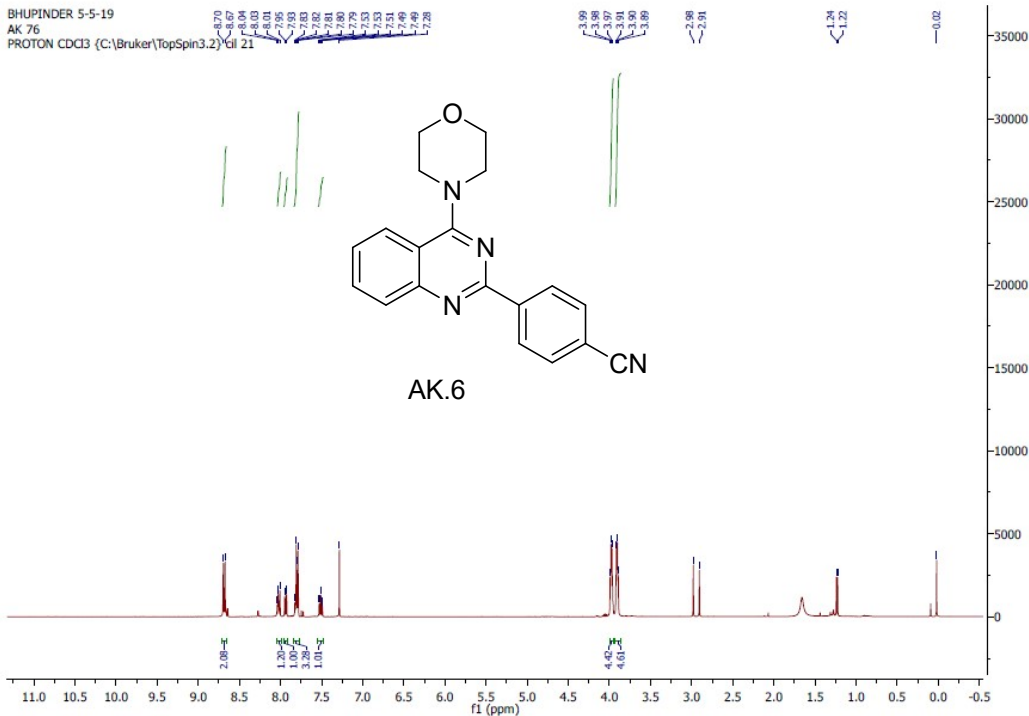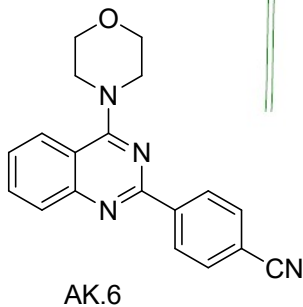

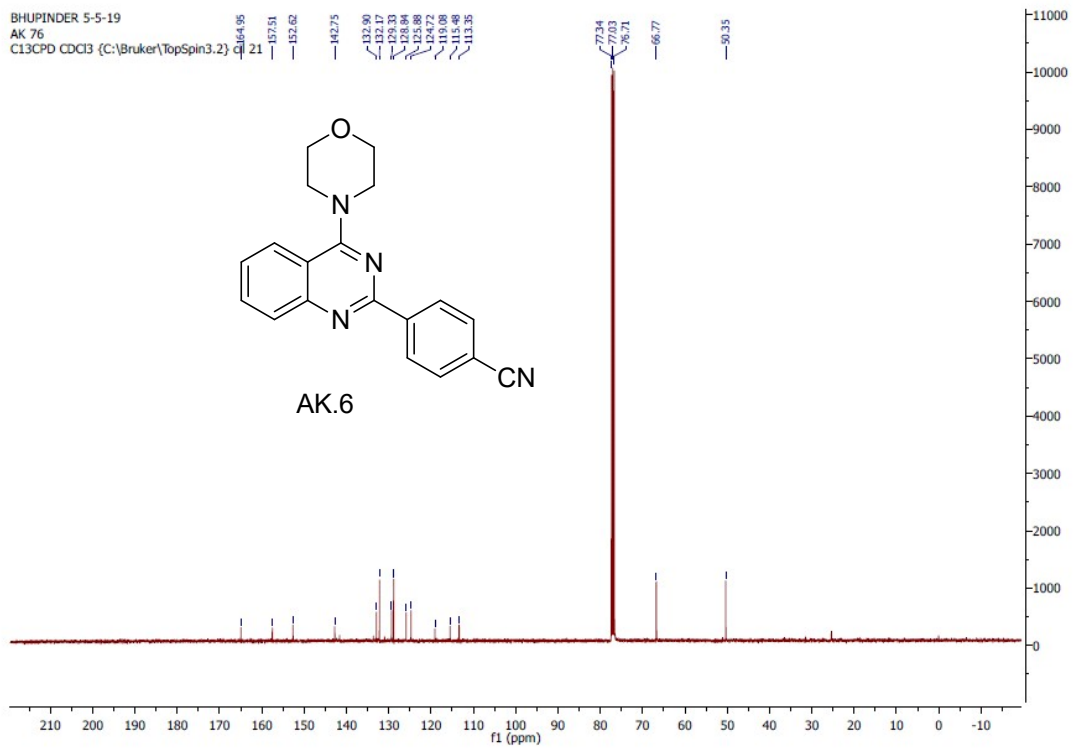

**Figure 6.** Spectras of compound AK-6

Elemental Composition Report

Single Mass Analysis

Tolerance = 300.0 PPM / DBE: min = -1.5, max = 50.0

Element prediction: Off

Number of isotope peaks used for i-FIT = 5

Monoisotopic Mass, Even Electron Ions

25 formula(e) evaluated with 1 results within limits (all results (up to 1000) for each mass)

Elements Used:

C: 21-21 H: 0-300 N: 0-4 O: 0-4

Sample Name : 280921\_AK-7

IITRRP

XEVO G2-XS QTOF

Test Name :

280921\_AK-7 27 (0.576)

1: TOF MS ES+

7.28e+006

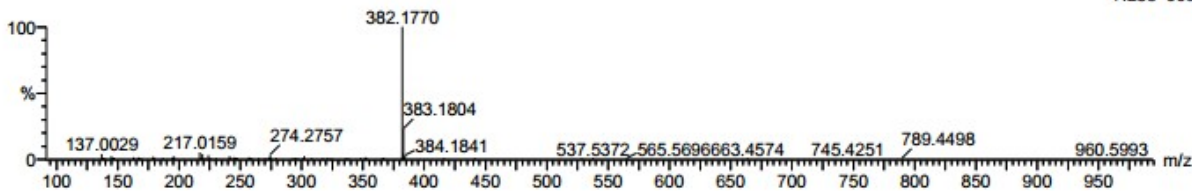

Minimum: -1.5  
Maximum: 2.0 300.0 50.0

| Mass     | Calc. Mass | mDa | PPM | DBE  | i-FIT  | Norm | Conf (%) | Formula       |
|----------|------------|-----|-----|------|--------|------|----------|---------------|
| 382.1770 | 382.1767   | 0.3 | 0.8 | 11.5 | 1420.1 | n/a  | n/a      | C21 H24 N3 O4 |

27Feb19  
AK\_91  
PROTON CDCl3 (C:\Bruker\TopSpin3.2) cil 21

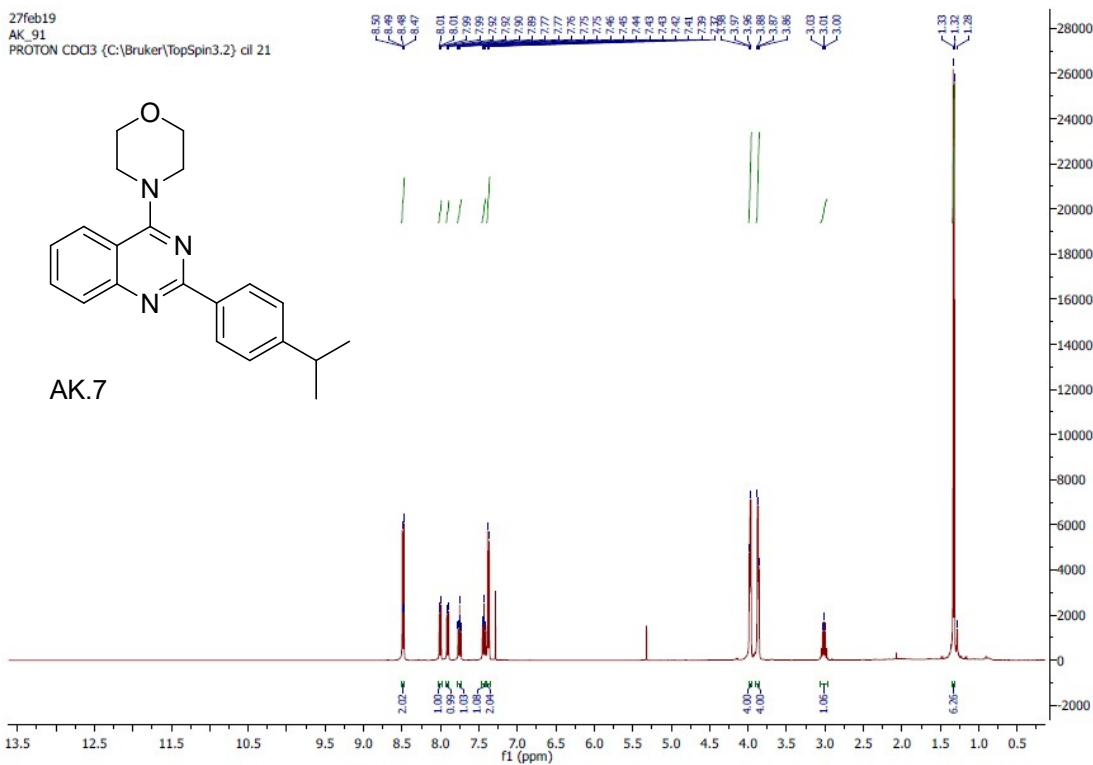

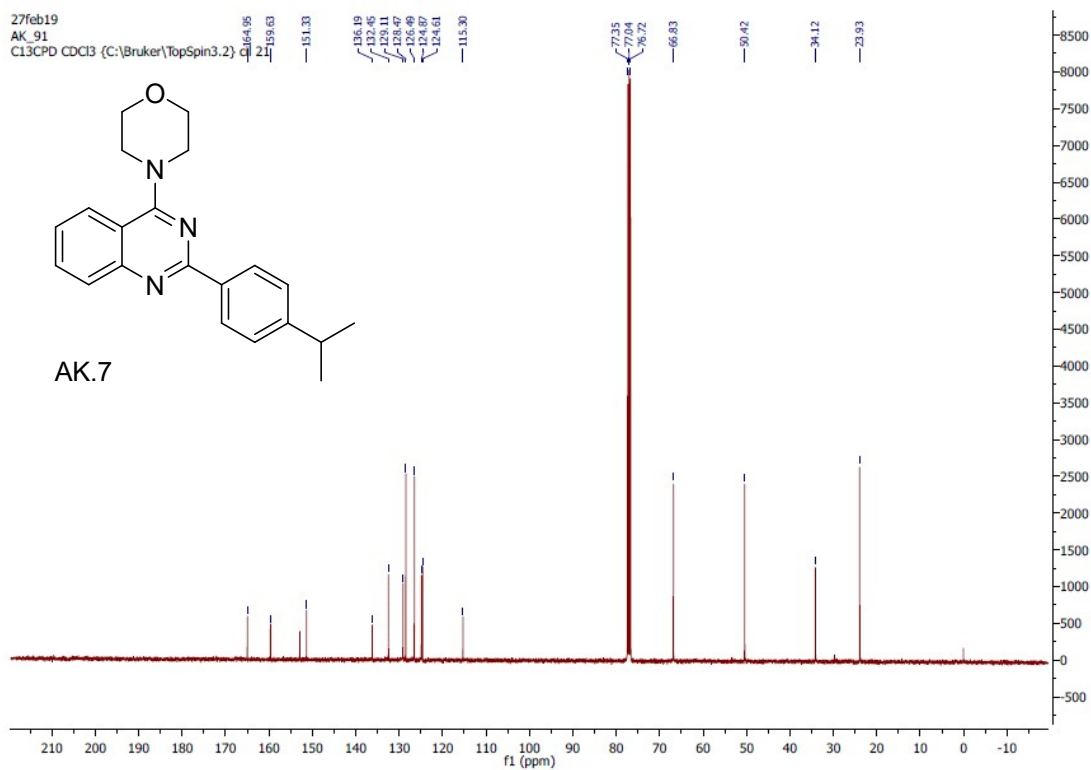

Figure 7. Spectras of compound AK-7

# Elemental Composition Report

## Single Mass Analysis

Tolerance = 300.0 PPM / DBE: min = -1.5, max = 50.0

Element prediction: Off

Number of isotope peaks used for i-FIT = 5

Monoisotopic Mass, Even Electron Ions

15 formula(e) evaluated with 1 results within limits (all results (up to 1000) for each mass)

Elements Used:

C: 19-19 H: 0-300 N: 0-4 O: 0-2

Sample Name : 280921\_AK-8

IITRPR

XEVO G2-XS QTOF

Test Name :

280921\_AK-8 29 (0.622)

1: TOF MS ES+  
1.30e+007

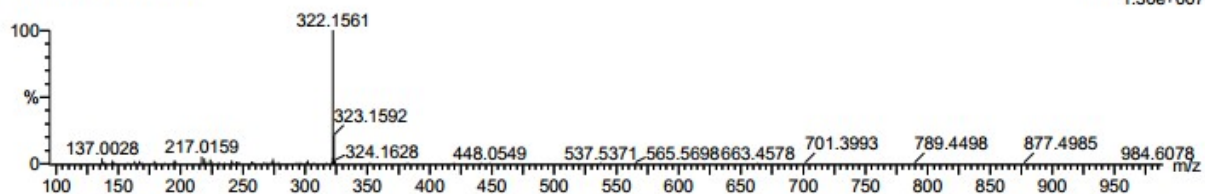

Minimum: -1.5  
Maximum: 2.0 300.0 50.0

| Mass     | Calc. Mass | mDa | PPM | DBE  | i-FIT  | Norm | Conf (%) | Formula       |
|----------|------------|-----|-----|------|--------|------|----------|---------------|
| 322.1561 | 322.1556   | 0.5 | 1.6 | 11.5 | 1507.9 | n/a  | n/a      | C19 H20 N3 O2 |

bhupinder 19-12-18  
AK 81  
PROTON CDCl3 (C:\Bruker\TopSpin3.2) cil 9

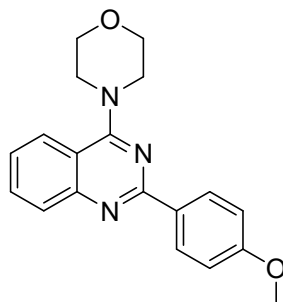

AK.8

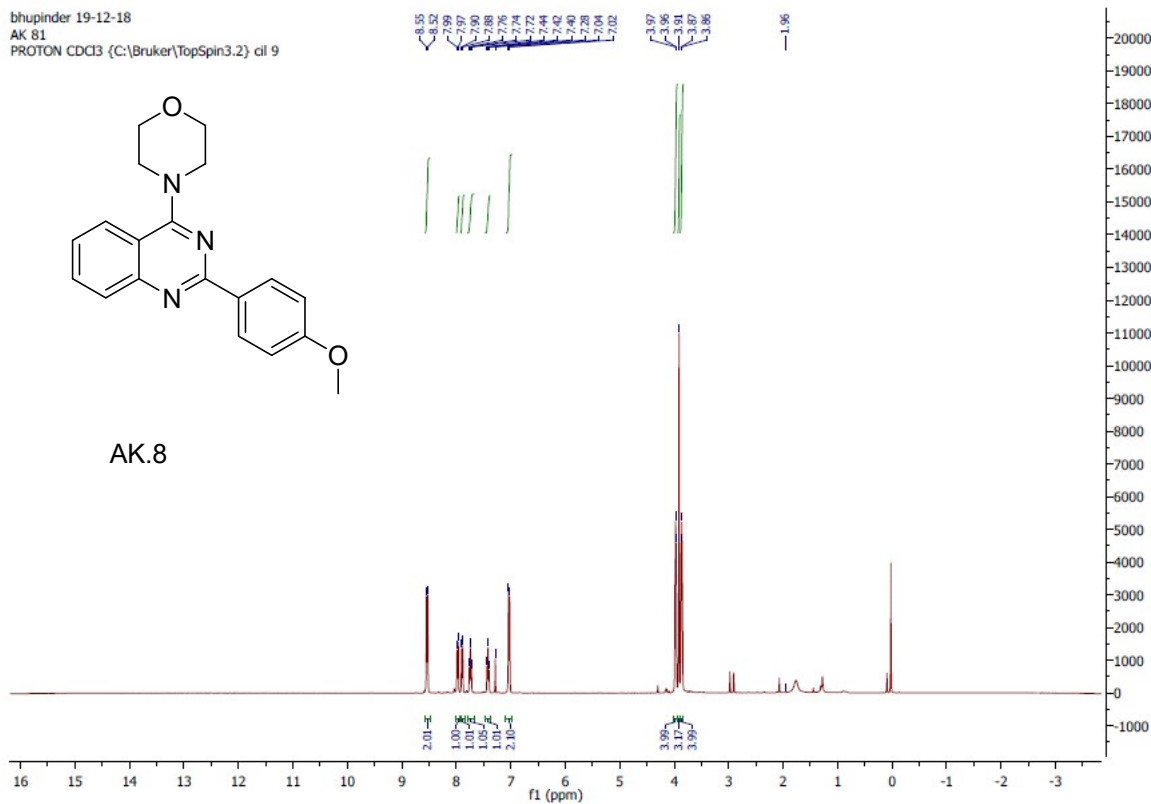

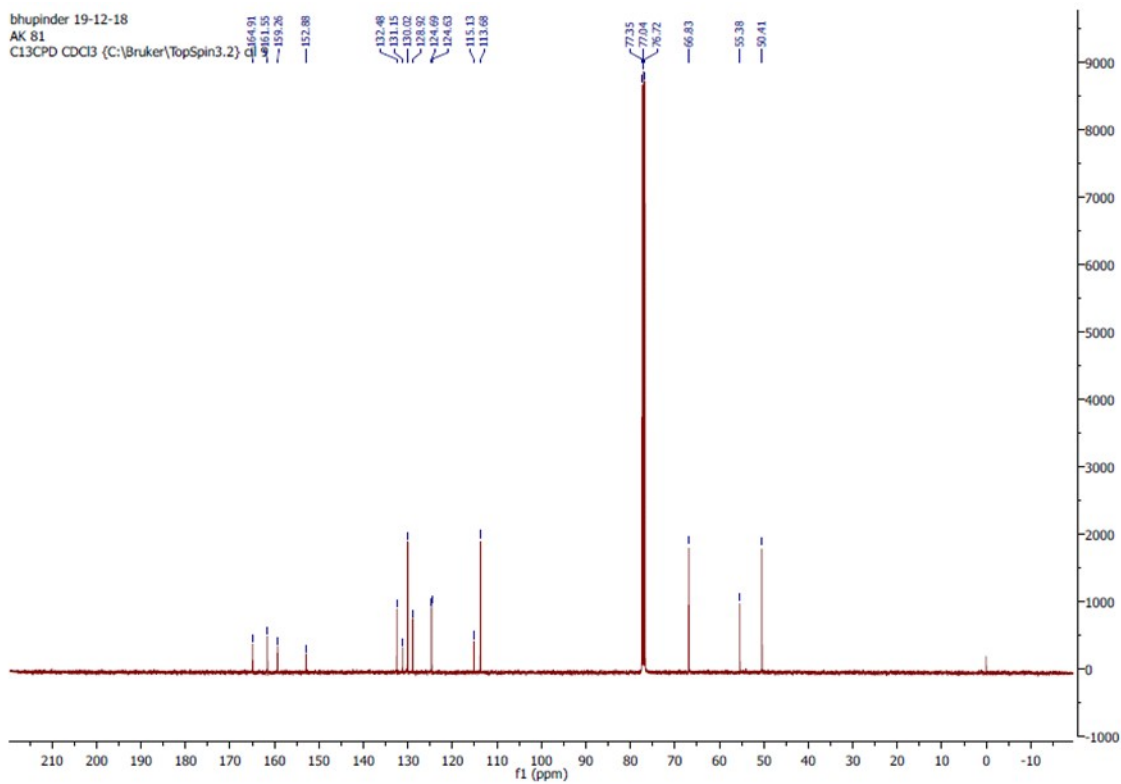

**Figure 8.** Spectras of compound AK-8



# Elemental Composition Report

## Single Mass Analysis

Tolerance = 300.0 PPM / DBE: min = -1.5, max = 50.0

Element prediction: Off

Number of isotope peaks used for i-FIT = 5

Monoisotopic Mass, Even Electron Ions

15 formula(e) evaluated with 0 results within limits (all results (up to 1000) for each mass)

Elements Used:

C: 20-20 H: 0-300 N: 0-4 O: 0-2

Sample Name : 280921\_AK-9

IITRPR

XEVO G2-XS QTOF

Test Name :

280921\_AK-9 13 (0.294)

1: TOF MS ES+  
1.32e+006

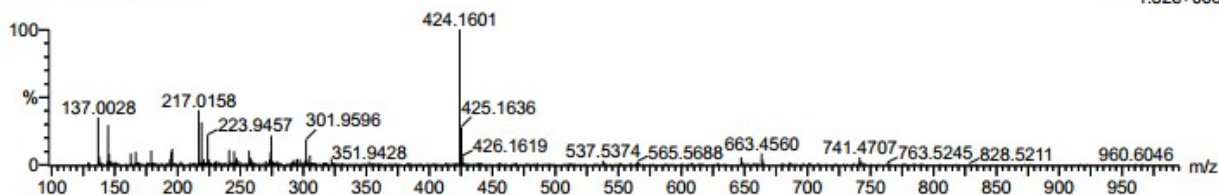

Minimum: -1.5  
Maximum: 2.0 300.0 50.0

| Mass     | Calc. Mass | mDa | PPM | DBE | i-FIT | Norm | Conf (%) | Formula |
|----------|------------|-----|-----|-----|-------|------|----------|---------|
| 424.1601 | ---        |     |     |     |       |      |          |         |

Apr05-2019  
AK-71

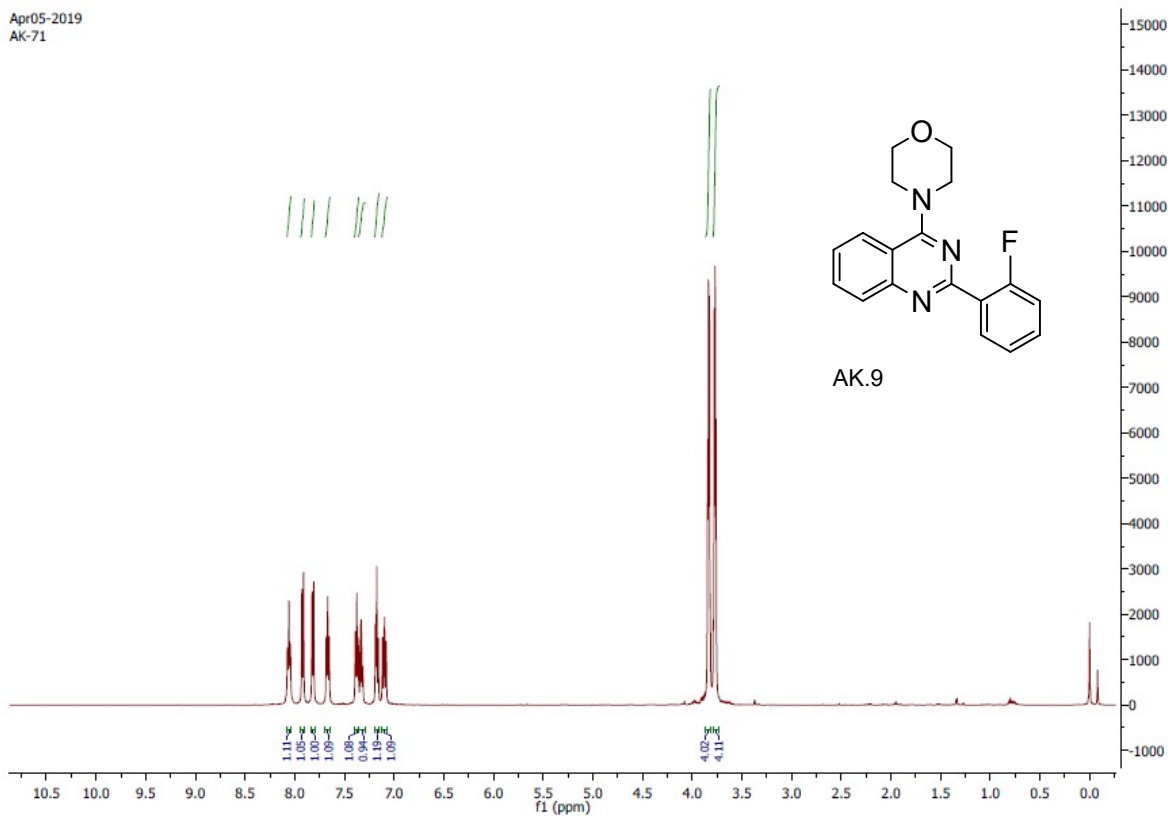

Apr05-2019  
AK-71

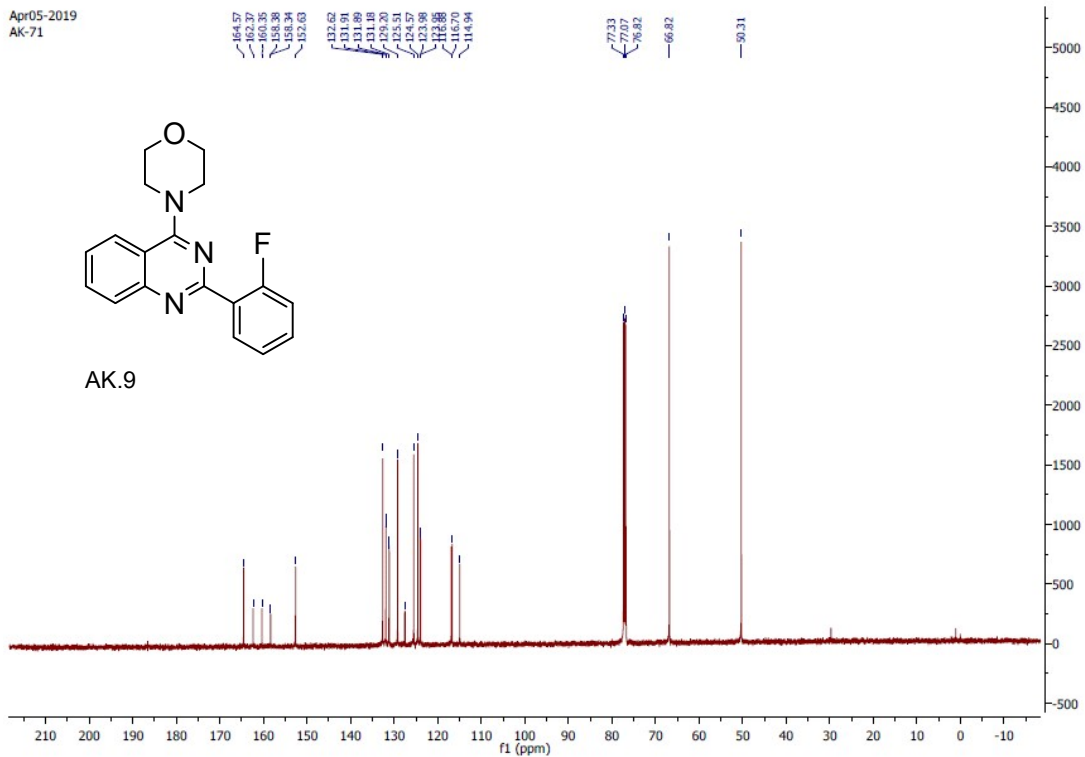

Figure 9. Spectras of compound AK-9

Single Mass Analysis

Tolerance = 300.0 PPM / DBE: min = -1.5, max = 50.0  
 Element prediction: Off  
 Number of isotope peaks used for i-FIT = 5

Monoisotopic Mass, Even Electron Ions

21 formula(e) evaluated with 6 results within limits (all results (up to 1000) for each mass)

Elements Used:

C: 20-21 H: 0-300 N: 0-4 O: 0-2

Sample Name : 280921\_AK-10

IITRPR

XEVO G2-XS QTOF

Test Name :

280921\_AK-10 20 (0.435)

1: TOF MS ES+  
1.48e+007

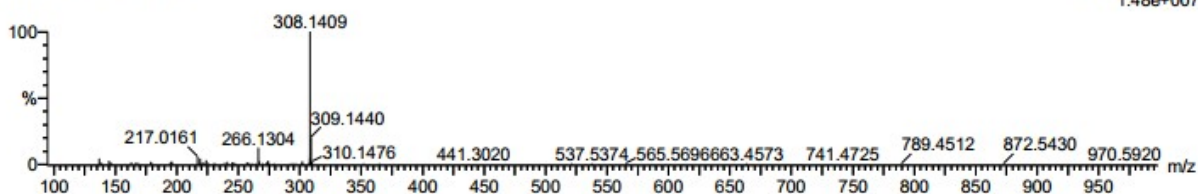

Minimum: -1.5  
 Maximum: 2.0 300.0 50.0

| Mass     | Calc. Mass | mDa   | PPM    | DBE  | i-FIT  | Norm  | Conf (%) | Formula      |
|----------|------------|-------|--------|------|--------|-------|----------|--------------|
| 308.1409 | 308.1188   | 22.1  | 71.7   | 16.5 | 1567.9 | 2.578 | 7.60     | C21 H14 N3   |
|          | 308.1651   | -24.2 | -78.5  | 10.5 | 1566.7 | 1.401 | 24.65    | C20 H22 N O2 |
|          | 308.0824   | 58.5  | 189.8  | 17.5 | 1566.7 | 1.427 | 24.00    | C20 H10 N3 O |
|          | 308.2014   | -60.5 | -196.3 | 9.5  | 1567.6 | 2.309 | 9.94     | C21 H26 N O  |
|          | 308.0712   | 69.7  | 226.2  | 17.5 | 1568.1 | 2.829 | 5.91     | C21 H10 N O2 |

BHUPINDER 5-5-19  
 AK 79  
 PROTON CDCl3 (C:\Bruker\TopSpin3.2) d1 25

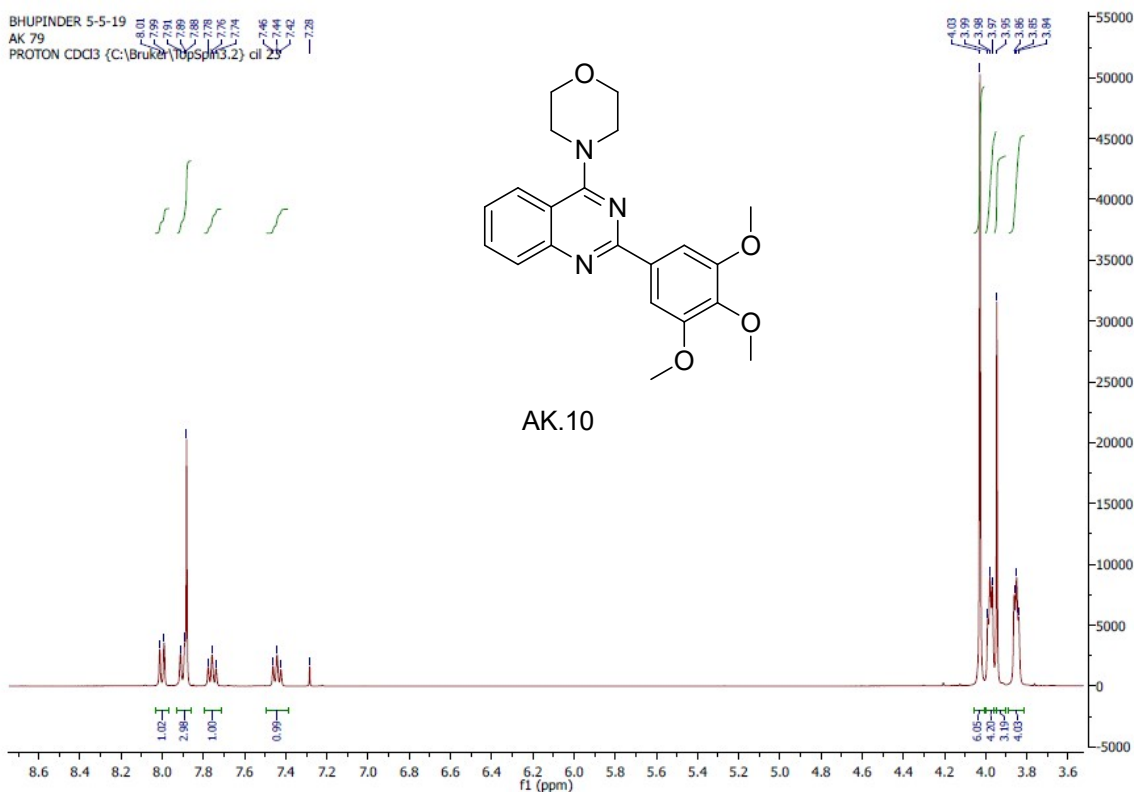

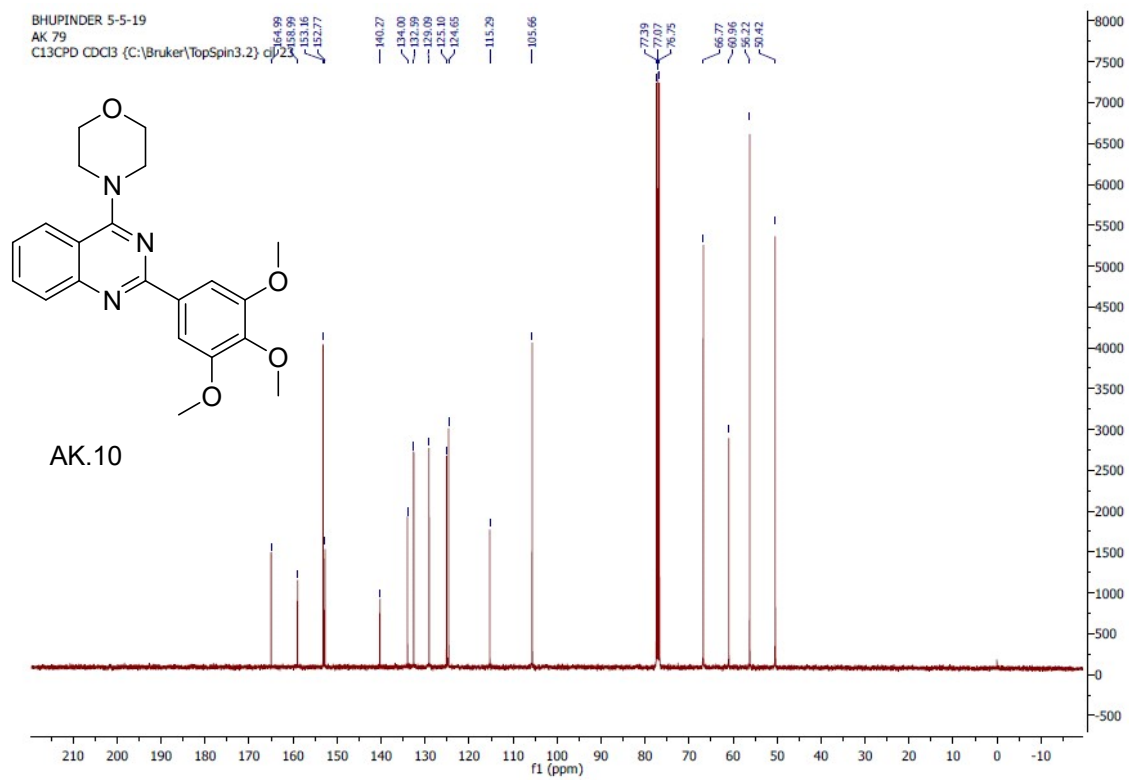

**Figure 10.** Spectras of compound AK-10

Elemental Composition Report

Single Mass Analysis

Tolerance = 300.0 PPM / DBE: min = -1.5, max = 50.0

Element prediction: Off

Number of isotope peaks used for i-FIT = 5

Monoisotopic Mass, Even Electron Ions

40 formula(e) evaluated with 1 results within limits (all results (up to 1000) for each mass)

Elements Used:

C: 18-18 H: 0-300 N: 0-4 O: 0-1 Cl: 0-1 F: 0-1

Sample Name : 280921\_AK-11

IITRPR

XEVO G2-XS QTOF

Test Name :

280921\_AK-11 22 (0.480)

1: TOF MS ES+  
1.33e+007

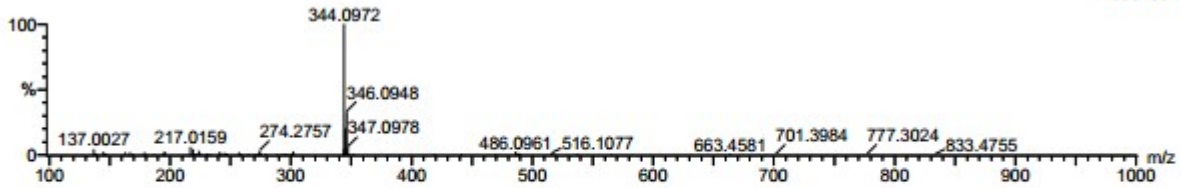

Minimum: -1.5  
Maximum: 2.0 300.0 50.0

| Mass     | Calc. Mass | mDa | PPM | DBE  | i-FIT  | Norm | Conf (%) | Formula           |
|----------|------------|-----|-----|------|--------|------|----------|-------------------|
| 344.0972 | 344.0966   | 0.6 | 1.7 | 11.5 | 1547.3 | n/a  | n/a      | C18 H16 N3 O Cl F |

Apr05-2019  
AK-93

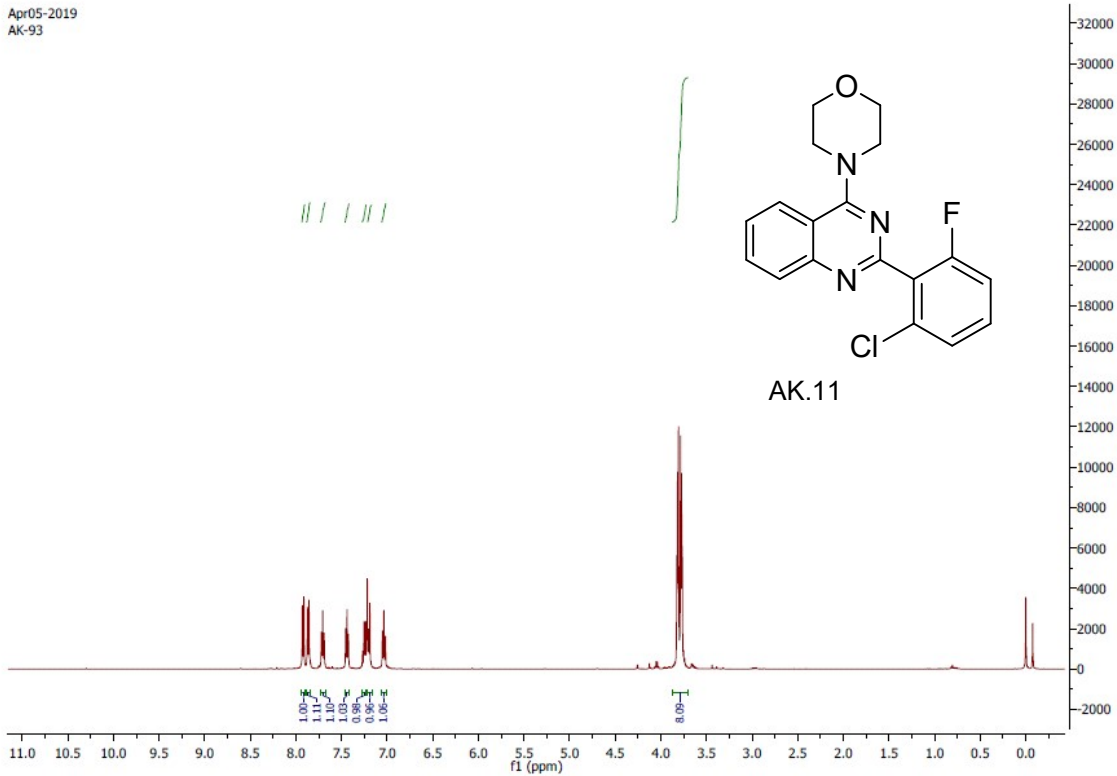

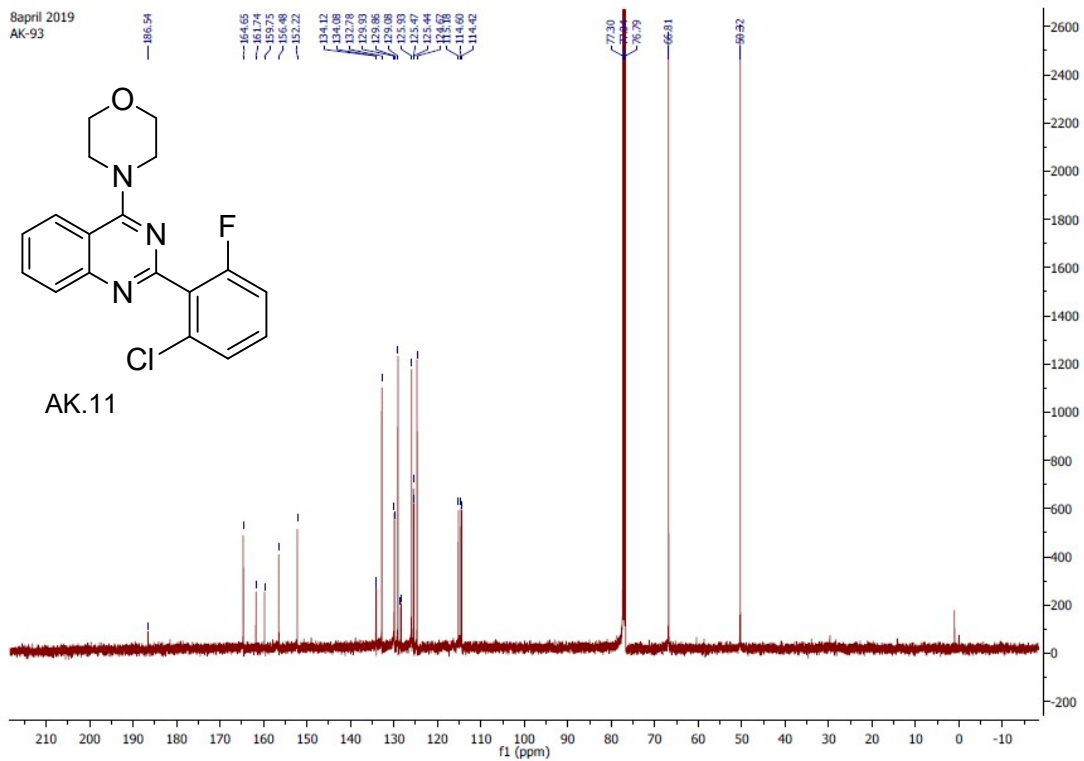

**Figure 11.** Spectras of compound AK-11

# Elemental Composition Report

## Single Mass Analysis

Tolerance = 300.0 PPM / DBE: min = -1.5, max = 50.0

Element prediction: Off

Number of isotope peaks used for i-FIT = 5

Monoisotopic Mass, Even Electron Ions

10 formula(e) evaluated with 1 results within limits (all results (up to 1000) for each mass)

Elements Used:

C: 19-19 H: 0-300 N: 0-4 O: 0-1

Sample Name : 280921\_AK-12

IITRPR

XEVO G2-XS QTOF

Test Name :

280921\_AK-12 22 (0.480)

1: TOF MS ES+

5.97e+006

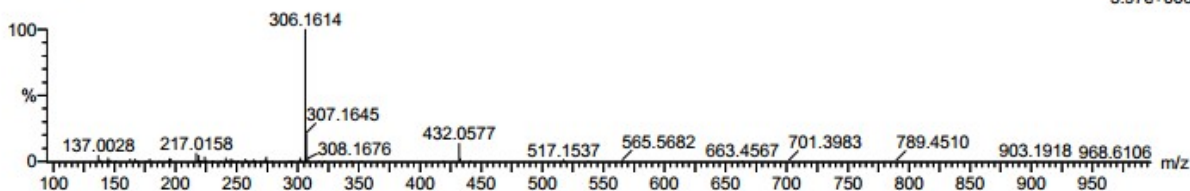

Minimum: -1.5  
Maximum: 2.0 300.0 50.0

| Mass     | Calc. Mass | mDa | PPM | DBE  | i-FIT  | Norm | Conf (%) | Formula      |
|----------|------------|-----|-----|------|--------|------|----------|--------------|
| 306.1614 | 306.1606   | 0.8 | 2.6 | 11.5 | 1385.2 | n/a  | n/a      | C19 H20 N3 O |

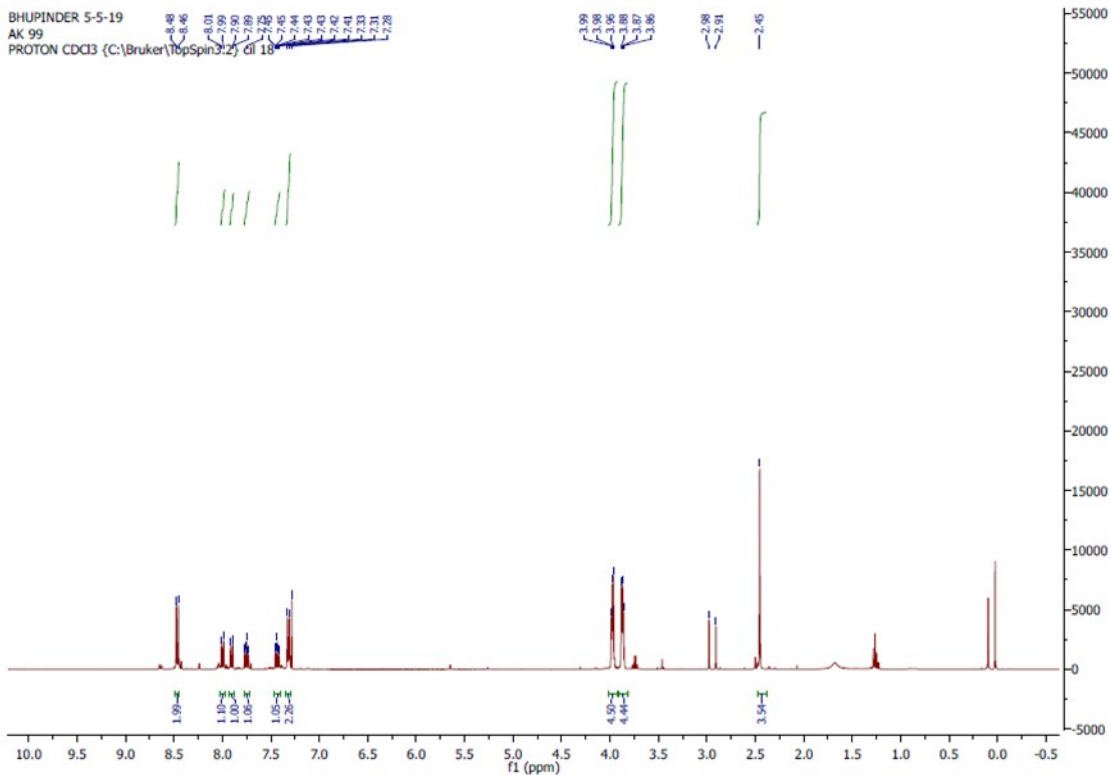

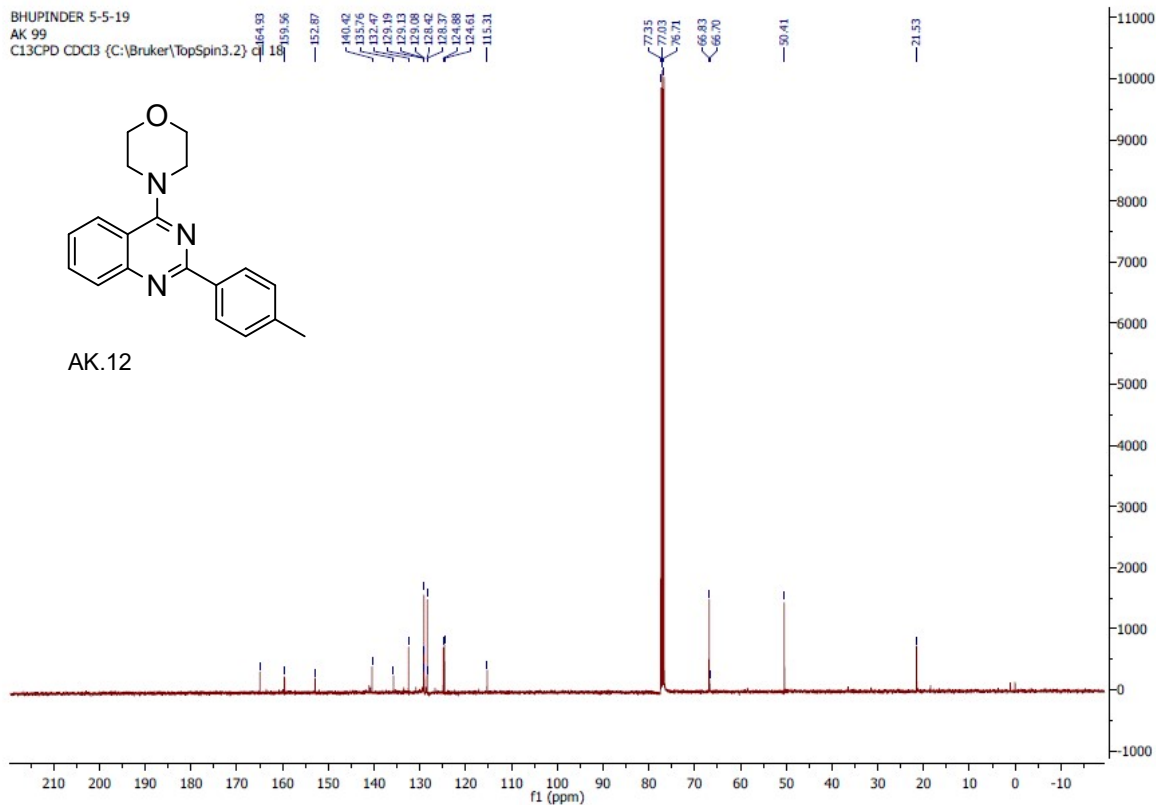

Figure 12. Spectras of compound AK-12

Elemental Composition Report

Single Mass Analysis

Tolerance = 300.0 PPM / DBE: min = -1.5, max = 50.0

Element prediction: Off

Number of isotope peaks used for i-FIT = 5

Monoisotopic Mass, Even Electron Ions

32 formula(e) evaluated with 1 results within limits (all results (up to 1000) for each mass)

Elements Used:

C: 19-19 H: 0-300 N: 0-3 O: 0-1 F: 0-3

Sample Name : 280921\_AK-13

IITRPR

XEVO G2-XS QTOF

Test Name :

280921\_AK-13 15 (0.328)

1: TOF MS ES+  
2.35e+007

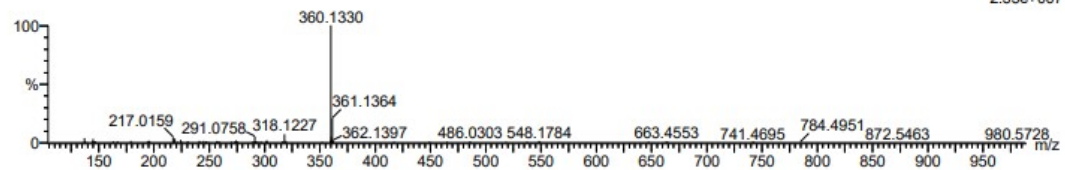

Minimum: -1.5  
Maximum: 2.0 300.0 50.0

| Mass     | Calc. Mass | mDa | PPM | DBE  | i-FIT  | Norm | Conf (%) | Formula         |
|----------|------------|-----|-----|------|--------|------|----------|-----------------|
| 360.1330 | 360.1324   | 0.6 | 1.7 | 11.5 | 1624.3 | n/a  | n/a      | C19 H17 N3 O F3 |



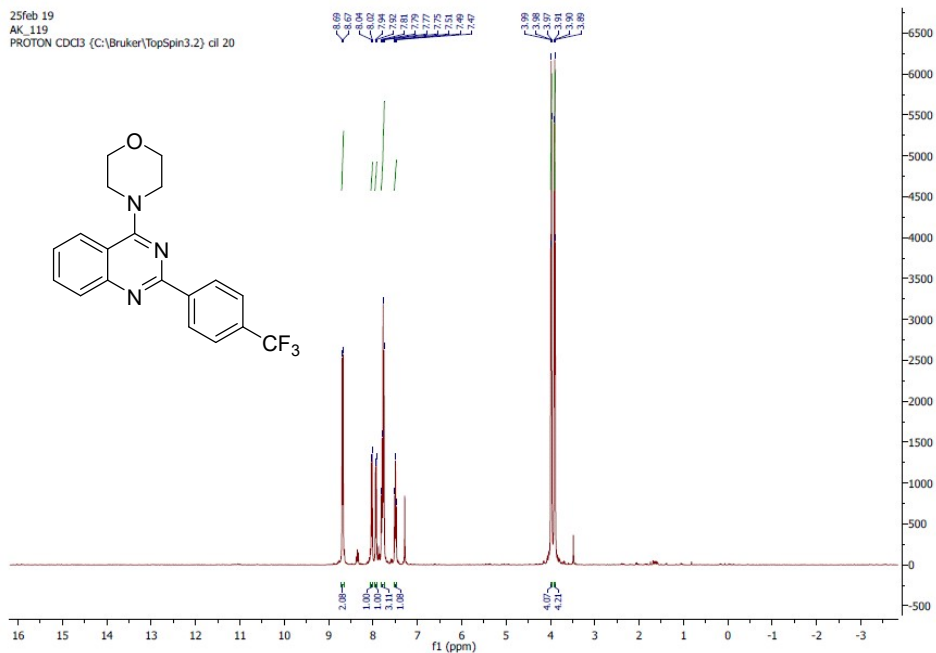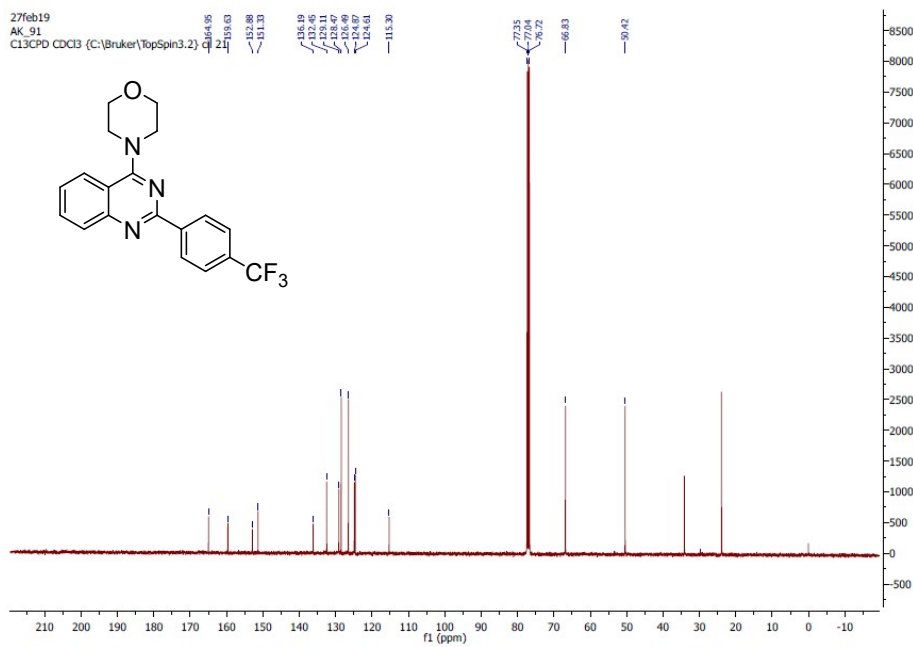

Figure 13. Spectras of compound AK-13

## DOCKING

**CDK-4**- PDB-ID: - 2W96

Coordinates for 2W96 binding site:  $x = -3.12, y = -3.92, z = 85.1$

No docking poses were generated.

**BAX**- PDB-ID: - 4S00

Coordinates for 2W96 binding site:  $x = 11.89, y = 7.0, z = 31.62$

| Sr. No. | Compound | Docking score |
|---------|----------|---------------|
| 1       | AK-10    | -2.380        |
| 2       | AK-3     | -1.207        |

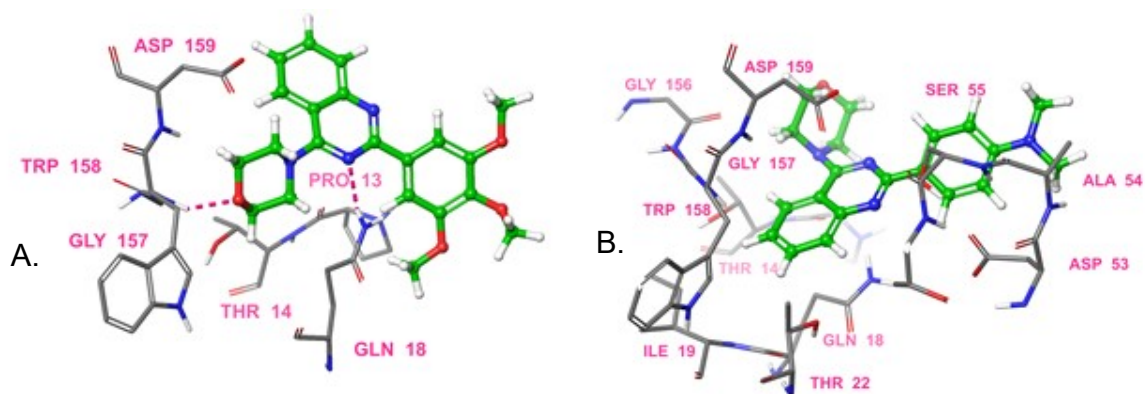

Figure 14: Docking pose of AK-3 (A) and AK-10 (B) with **BAX**- PDB-ID: 4S00

**BCL-XL**- PDB-ID: - 6VWC

Coordinates for 2W96 binding site:  $x = 1.78, y = -4.03, z = 10.8$

| Sr. No. | Compound | Docking score |
|---------|----------|---------------|
| 1       | AK-3     | -7.042        |
| 2       | AK-10    | -6.965        |
|         |          |               |

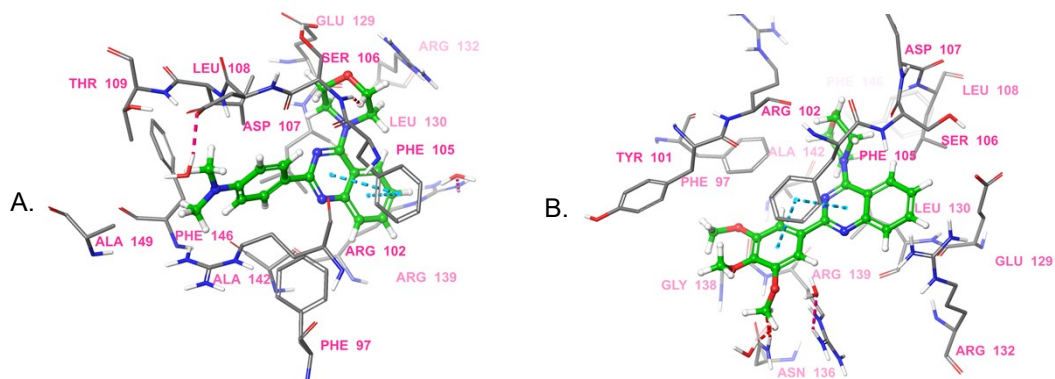

Figure 15: Docking pose of AK-3 (A) and AK-10 (B) with **BCL-XL**- PDB-ID: 6VWC

**Table 1: R SQUARED VALUES**

| Compound   | R <sup>2</sup> |        |        |        |
|------------|----------------|--------|--------|--------|
|            | A549           | MCF7   | SHSY   | HEK    |
| AK-1       | 0.9797         | 0.9335 | 1      | NA     |
| AK-2       | 1              | 0.9279 | 0.9941 | NA     |
| AK-3       | 0.8641         | 0.952  | 0.8162 | 0.785  |
| AK-4       | 1              | 0.9273 | 0.9762 | NA     |
| AK-5       | 0.9619         | 0.9934 | 0.9478 | 0.9692 |
| AK-6       | 0.9918         | 0.945  | 0.9063 | NA     |
| AK-7       | 0.9975         | 0.9816 | 0.9273 | NA     |
| AK-8       | 0.9661         | 0.964  | 0.2599 | NA     |
| AK-9       | 0.9771         | 0.9362 | 0.705  | 0.899  |
| AK-10      | 0.9862         | 0.9821 | 0.9978 | 0.9781 |
| AK-11      | 0.9761         | 0.9074 | 0.945  | NA     |
| AK-12      | 0.9856         | 0.9696 | 0.9613 | NA     |
| AK-13      | 0.994          | 0.9842 | 0.9974 | 0.8906 |
| COLCHICINE | 0.9887         | 0.9753 | 0.9999 | 0.9097 |
